# Supplementary material
Source: PubMed Central journal article supplement (PMC4154074)
Supplement: tableS1.pdf [file tableS1.pdf]

**Phosphopeptides that changed significantly in abundance ( $p < 0.05$  (t-test);  $|\log_2(500/300 \text{ mOsmol/kg})| > 1$ ) in response to high NaCl.**

| Phosphopeptide            | m/z         | log <sub>2</sub><br>(500/300) | Gene symbol | protein ratio<br>(500/300) | Phosphosite  | previously<br>reported | Refseq        |
|---------------------------|-------------|-------------------------------|-------------|----------------------------|--------------|------------------------|---------------|
| TAS*LPGYGR                | 501.227     | -1.27                         | ABLIM1;     |                            | S655         | Y                      | NP_002304.3   |
| SSMS*GLHLVK               | 572.781     | -1.64                         | ACACA;      |                            | S117         | Y                      | NP_942131.1   |
| SSDITSDLGNVLTST*PNAK      | 1003.48     | -1.81                         | ACBD5;      |                            | T172         | Y                      | NP_663736.2   |
| AAKLS*EGSQPAEEEEEDQETPSR  | 828.697     | -2.43                         | ACIN1;      |                            | S240         | Y                      | NP_055792.1   |
| TAESQT*PTPSATSFSSGK       | 965.433     | 3.18                          | ADAR;       |                            | T601         | Y                      | NP_001102.2   |
| NSYNSQAPS*PGLGSK          | 853.878     | -1.53                         | AFF4;       | 0.993                      | S1043        | Y                      | NP_055238.1   |
| SLLGDSAPTLHLNKGTPSQS*PV   | 903.112     | -1.44                         | AGFG1;      |                            | T177, S181   | Y                      | NP_004495.2   |
| AS*LGSLEGEAEAEASS*PKGK    | 1045.46     | -2.77                         | AHNAK;      | 1.022                      | S5749, S5763 | Y                      | NP_001611.1   |
| S*SKASLGS*LEGEAEAEASSPK   | 736.324     | -2.75                         | AHNAK;      |                            | S5745, S5752 | Y                      | NP_001611.1   |
| SSKAS*LGS*LEGEAEAEASSPK   | 1103.98     | -2.51                         | AHNAK;      |                            | S5749, S5752 | Y                      | NP_001611.1   |
| ASLGS*LEGEAEAEASSPK       | 909.909     | -1.87                         | AHNAK;      |                            | S5752        | Y                      | NP_001611.1   |
| TVIRLPS*GSGAAS*PTGSAVDIR  | 764.702     | 1.61                          | AHNAK;      |                            | S210, S216   | Y                      | NP_001611.1   |
| VSMPDVELNLKS*PK           | 824.925     | 2.24                          | AHNAK;      |                            | S3426        | Y                      | NP_001611.1   |
| TVIRLPSGS*GAAS*PTGSAVDIR  | 764.702     | 3.71                          | AHNAK;      |                            | S212, S216   | Y                      | NP_001611.1   |
| GPAFNM^AS^PESDFGINLK      | 998.945     | 4.04                          | AHNAK;      |                            | S5552        | Y                      | NP_001611.1   |
| CDSSPDS*AEDVR             | 709.251     | -4.73                         | AHSG;       | 1.082                      | S138         | Y                      | NP_001613.2   |
| SAESPTS*PVTSETGSTFK       | 949.922     | 1.19                          | AKAP12;     | 0.988                      | S188         | Y                      | NP_653080.1   |
| SSDEENGPPSS*PDLDR         | 896.351     | -1.14                         | AKT1S1;     | 1.061                      | S212         | Y                      | NP_001092102. |
| KSYESSEDCSEAAGS*PAR       | 670.93      | -1.41                         | ALKBH5;     |                            | S384         | Y                      | NP_060228.3   |
| SYESSEDCSEAAGS*PAR        | 941.844     | -1.95                         | ALKBH5;     |                            | S384         | Y                      | NP_060228.3   |
| IM^SS^IGEGIDFSQER         | 882.88      | -2.22                         | ANKS1A;     |                            | S677         | Y                      | NP_056060.2   |
| NKAS*PQSEFM^PSK           | 779.855     | 1.36                          | ANLN;       |                            | S792         | Y                      | NP_061155.2   |
| SSS*PELVTHLK              | 642.321     | 1.50                          | ARHGAP1;    | 0.994                      | S51          | Y                      | NP_004299.1   |
| SSQGDTPAQAS*PPEEK         | 912.371     | -1.63                         | ARHGAP27;   |                            | S125         | Y                      | NP_954976.1   |
| SLS*PILPGR                | 510.269     | -1.33                         | ARHGEF18;   |                            | S1103        | Y                      | NP_001124427. |
| GPS*PSPVGSPASVAQSR        | 830.889     | -1.20                         | ARID1A;     |                            | S696         | Y                      | NP_006006.3   |
| GPS*PSPVGS*PASVAQSR       | 870.872     | -1.06                         | ARID1A;     |                            | S696, S702   | Y                      | NP_006006.3   |
| NDSVIVADQT*PT*PTR         | 887.377     | 1.76                          | ATF2;       |                            | T69, T71     | Y                      | NP_001871.2   |
| TDSVIIADQT*PT*PTR         | 892.891     | 2.64                          | ATF7;       |                            | T51, T53     | Y                      | NP_001123532. |
| NKQDDDLNCEPLS*PHNIT*PEPV  | 969.748     | 2.11                          | ATF7IP;     |                            | S113, T118   | Y                      | NP_060649.3   |
| SLAFEEGS*QSTTISSLSEK      | 1043.98     | 2.67                          | ATM;LOC6516 |                            | S1981        | Y                      | NP_000042.3   |
| IEDS*EPHIPLIDDTDAEDDAPTKR | 924.747     | -1.60                         | ATP2B1;     |                            | S1155        | Y                      | NP_001673.2   |
| SS*TPLHS*PSPIR            | 724.815     | -1.29                         | BAG3;       |                            | S284, S289   | Y                      | NP_004272.2   |
| EGTLTQVPLAPPPGAPPS*PAP    | 1199.61     | -2.27                         | BAT2;       | 0.979                      | S1147        | Y                      | NP_542417.2   |
| DHTVS*GDEDYCPR            | 815.2923031 | 1.87                          | BAZ1B;      | 0.960                      | S947         | Y                      | NP_115784.1   |
| GTEPSPGGTPQPSRPVS*PAGPF   | 1113.86     | -4.23                         | BCL7C;      |                            | S126         | Y                      | NP_004756.2   |
| KADTTTPTTAILAPGS*PASPPG   | 928.136     | -2.59                         | BRD2;       |                            | S298         | Y                      | NP_005095.1   |

|                           |         |       |            |              |   |               |
|---------------------------|---------|-------|------------|--------------|---|---------------|
| KADTTTPTTAILAPGS*PASPPG   | 954.791 | -1.65 | BRD2;      | S298, S305   | Y | NP_005095.1   |
| IPELVGS*PTQSTSSR          | 876.433 | -1.06 | BRWD1;     | S1475        | Y | NP_061836.2   |
| YEYDPDIS*PPR              | 716.296 | -2.52 | BUD13;     | S325         | Y | NP_116114.1   |
| HDT*PDPS*PLR              | 647.747 | -1.61 | BUD13;     | T159, S163   | Y | NP_116114.1   |
| LAVLSS*SLTHWK             | 714.374 | -2.40 | C11orf59;  | 0.943<br>S97 | N | NP_060377.1   |
| SIS*GTPAETPACK            | 702.813 | 4.31  | C12orf51;  | S1075        | Y | NP_001103132. |
| DLFSLDSEDSPAS*PPLR        | 1011.96 | -1.42 | C16orf53;  | S237         | Y | NP_078792.1   |
| RDS*SESQLASTESDKPTTGR     | 753.344 | 1.43  | C18orf25;  | S66          | Y | NP_659492.1   |
| WKEPGSGGPQNLS*GPGGR       | 620.952 | -2.04 | C19orf61;  | S32          | Y | NP_061981.2   |
| LS*STDDGYIDLQFK           | 844.382 | 2.48  | C20orf30;  | S23          | Y | NP_001009924. |
| KSPSGPVKS*PPLSPVGTTPVK    | 740.708 | 1.94  | C2orf49;   | S189, T198   | Y | NP_076998.1   |
| KSPSGPVKS*PPLS*PVGTTPVK   | 746.728 | 2.11  | C2orf49;   | S189, S193   | Y | NP_076998.1   |
| SPSGPVKS*PPLS*PVGTTPVK    | 702.023 | 2.59  | C2orf49;   | S189, S193   | Y | NP_076998.1   |
| ST*DSSSVSGSLQQETK         | 863.878 | 1.21  | C9orf82;   | T90          | Y | NP_079104.2   |
| S*TDSSSVSGSLQQETK         | 863.878 | 1.36  | C9orf82;   | S89          | Y | NP_079104.2   |
| RFS*PSQVPIQTR             | 748.375 | 2.54  | CAMSAP1L1; | S1008        | Y | NP_982284.1   |
| ANS*TSDSVFTETPSPVLK       | 983.462 | 1.18  | CDC42EP3;  | S89          | Y | NP_006440.2   |
| KDLSLGLDDS*RTNT*PQGVLPSS  | 943.786 | -2.33 | CDK13;     | S1054, T1058 | Y | NP_112557.2   |
| LGS*LSARS*DSEATISR        | 915.402 | -3.59 | CEP170;    | S1160, S1165 | Y | NP_055627.2   |
| LGEAS*DSELADADK           | 753.819 | -2.46 | CEP170;    | S1112        | Y | NP_055627.2   |
| TQDPSSPGTT*PPQAR          | 810.357 | -2.51 | CHAF1B;    | T433         | Y | NP_005432.1   |
| NSSNTSVGS*PSNTIGR         | 829.855 | -2.21 | CLASP1;    | S1071        | Y | NP_001135745. |
| VLSTS*TDLEAAVADALK        | 895.451 | -1.35 | CLASP1;    | S797         | Y | NP_056097.1   |
| TASESISNLSEAGS*IK         | 837.386 | -2.19 | CLIP1;     | S204         | Y | NP_002947.1   |
| TTTAAGSSHSRPGVPVEGS*PGF   | 859.078 | -1.70 | CNNM3;     | S652         | Y | NP_951060.1   |
| TDNM^LSDQT*PT*PTR         | 881.836 | 2.69  | CREB5;     | T59, T61     | Y | NP_878901.2   |
| TS*M^GGTQQQFVEGVR         | 860.872 | -1.22 | CTNNB1;    | S552         | Y | NP_001895.1   |
| RTS*MGGTQQQFVEGVR         | 627.625 | -1.18 | CTNNB1;    | S552         | Y | NP_001091679. |
| VGGS*SVDLHR               | 553.754 | -2.98 | CTNND1;    | S167         | Y | NP_001078932. |
| TQT*PPVSPAPQPTTEER        | 907.92  | -1.59 | CTTN;      | T401         | Y | NP_005222.2   |
| AKTQT*PPVSPAPQPTTEER      | 677.336 | -1.22 | CTTN;      | T401         | Y | NP_005222.2   |
| S*VSSPTSSNTPTPTK          | 788.864 | 2.76  | CYTSB;     | S131         | Y | NP_001028725. |
| KICTLPSPPS*PLASLAPVADSSTI | 849.096 | -1.63 | DAXX;      | S683         | Y | NP_001135442. |
| DGEQS*PNVSLM^AQR          | 778.825 | 1.33  | DCAF6;     | S336         | Y | NP_060912.2   |
| KASSPS*PLTIGT*PESQR       | 926.463 | -1.62 | DCP1A;     | S525, T531   | Y | NP_060873.3   |
| SLS*YEEPR                 | 535.726 | 1.76  | DCP1B;     | S275         | Y | NP_689853.3   |
| RSS*LYGIAK                | 545.786 | 1.18  | DENND4C;   | S948         | Y | NP_060395.4   |
| YNS*YDISR                 | 554.223 | 2.25  | DENND5B;   | S178         | N | NP_659410.3   |
| EQM^M^NSSISSGSGS*LR       | 891.856 | -2.61 | DLG1;      | S575         | Y | NP_004078.2   |
| DTIIDVVGAPLT*PNSR         | 874.436 | -1.13 | DMAP1;     | T445         | Y | NP_061973.1   |

|                          |         |       |           |       |                |   |               |
|--------------------------|---------|-------|-----------|-------|----------------|---|---------------|
| SKPIPI^PAS*PQK           | 751.399 | 2.05  | DNM1L;    | 1.011 | S616           | Y | NP_036192.2   |
| QILACS*PVSSVR            | 755.379 | -1.22 | DNTTIP2;  |       | S117           | Y | NP_055412.2   |
| QISGQYSGS*PQLLK          | 793.385 | 1.94  | DOCK7;    |       | S30            | Y | NP_212132.2   |
| VDDDS*LGEFPVTNSR         | 865.868 | -1.39 | DPF2;     |       | S142           | Y | NP_006259.1   |
| VVPSFLPVDQGGG*LVGR       | 903.962 | -1.77 | DSG2;     |       | S680           | Y | NP_001934.2   |
| KPVTVS*PTTPTS*PTEGEAS    | 1026.45 | 1.16  | DYNC1LI1; | 1.075 | S510, S516     | Y | NP_057225.2   |
| KPVTVSPTTPT*SPTEGEAS     | 986.467 | 1.32  | DYNC1LI1; |       | T515           | Y | NP_057225.2   |
| KPVTVSPTTPTS*PTEGEAS     | 986.467 | 1.33  | DYNC1LI1; |       | S516           | Y | NP_057225.2   |
| ITRKPVTVSPTTPTS*PTEGEAS  | 784.728 | 1.64  | DYNC1LI1; |       | S516           | Y | NP_057225.2   |
| KPVTVSPTT*PTS*PTEGEAS    | 1026.45 | 3.25  | DYNC1LI1; |       | T513, S516     | Y | NP_057225.2   |
| SQDVAVS*PQQQCSK          | 888.883 | -1.12 | EDC3;     |       | S131           | Y | NP_079359.2   |
| RADLNQGIGEPQS*PSR        | 824.871 | -1.56 | EFHD2;    | 0.950 | S74            | Y | NP_077305.2   |
| ELVEPLT*PSGEAPNQALLR     | 1057.53 | 3.46  | EGFR;     |       | T693           | Y | NP_005219.2   |
| AKPPADPAAAAS*PCR         | 788.37  | -2.25 | EGLN1;    | 0.920 | S125           | Y | NP_071334.1   |
| SDS*RAQAVSEDAGGNEGR      | 629.589 | -3.08 | EIF3B;    |       | S119           | Y | NP_001032360. |
| FLM^ECRNS*PVTK           | 789.347 | -2.57 | EIF4EBP1; | 0.974 | S65            | Y | NP_004086.1   |
| TQT*PPLGQTPQLGLK         | 832.94  | -1.31 | EIF4G2;   |       | T508           | Y | NP_001409.3   |
| GIS*QTNLITVT*PEKK        | 951.475 | -1.59 | EPB41L3;  | 0.995 | S460, T469     | Y | NP_036439.2   |
| GIS*QTNLITVTPEK          | 844.435 | -1.55 | EPB41L3;  |       | S460           | Y | NP_036439.2   |
| GIS*QTNLITVTPEKK         | 911.492 | -1.55 | EPB41L3;  |       | S460           | Y | NP_036439.2   |
| QVS*ASELHTSGILGPETLR     | 692.344 | 1.45  | EPPK1;    | 1.022 | S2716 or S3250 | Y | NP_112598.2   |
| RQVS*ASELHTSGILGPETLR    | 1126.07 | 1.51  | EPPK1;    |       | S2716 or S3250 | Y | NP_112598.2   |
| RQVSAS*ELHTSGILGPETLR    | 751.05  | 2.00  | EPPK1;    |       | S2718 or S3252 | Y | NP_112598.2   |
| SINKLDS*PDPFK            | 726.863 | 1.29  | EPS15;    |       | S796           | Y | NP_001972.1   |
| NGS*PTPAGSLGGGAVATAGGP   | 1038.97 | -1.61 | FAM117B;  |       | S10            | N | NP_775782.2   |
| RIDFIPVSPAPS*PTR         | 866.943 | -2.94 | FAM122A;  |       | S147           | Y | NP_612206.3   |
| VSAGEPGSHPS*PAPR         | 763.344 | -1.33 | FARP1;    |       | S427           | Y | NP_005757.1   |
| GSPTDAEGS*PGLSR          | 705.799 | -1.63 | FLJ10357; |       | S262           | Y | NP_060541.3   |
| IQDIKTEN~GTCPS*PPQPLS*PA | 1164.54 | -2.23 | FOXC1;    | 1.139 | S235, S241     | Y | NP_001444.2   |
| EGS*PAPLEPEPGAAQPK       | 880.914 | -1.40 | FOXK2;    |       | S398           | Y | NP_004505.2   |
| LRGQS*TDS*LPQTICR        | 946.411 | -1.63 | FRMD6;    |       | S514, S517     | N | NP_689543.1   |
| LLDLPAAAAS*SEDIERS       | 888.919 | -1.70 | GAL;      |       | S116           | Y | NP_057057.2   |
| VS*SPLPSPSAM^TDAANSQAAAI | 1099    | -2.88 | GATAD2B;  |       | S333           | Y | NP_065750.1   |
| LQQQAALS*PTTAPAVSSVSK    | 1035.53 | 1.01  | GATAD2B;  |       | S486           | Y | NP_065750.1   |
| ALSSGGSITS*PPLSPALPK     | 933.49  | -1.04 | GIGYF2;   |       | S26            | Y | NP_056390.2   |
| SQGS*PEDSAPQASPGPSK      | 903.881 | -2.61 | GMIP;     |       | S234           | Y | NP_057657.2   |
| VGDST*PVSEKPVSAVDANASE   | 1200.55 | 2.00  | GORASP2;  |       | T433           | Y | NP_056345.3   |
| GLGLGANLTEAQALT*PTGPSR   | 1052.53 | 1.82  | GPKOW;    |       | T216           | Y | NP_056513.2   |
| RYDS*DDDLPR              | 676.276 | -1.79 | GPR137C;  |       | S357           | Y | NP_001093122. |
| GNSRPGT*PSAEGGSTSSTLR    | 700.296 | -2.60 | GTF2F1;   | 0.994 | T389           | Y | NP_002087.2   |

|                          |         |       |           |       |            |   |                |
|--------------------------|---------|-------|-----------|-------|------------|---|----------------|
| NQIPRT*PENLITEIR         | 947.489 | 1.84  | HAUS6;    |       | T584       | Y | NP_060115.3    |
| M^ETFS*PAVGNR            | 652.771 | 3.16  | HAUS6;    |       | S715       | Y | NP_060115.3    |
| VASS*PVM^VSNPATR         | 756.35  | 1.57  | HCFC1;    | 0.972 | S598       | Y | NP_005325.2    |
| TITLVKS*PISVPGGSALISNLGK | 1172.67 | 2.42  | HCFC1;    |       | S666       | Y | NP_005325.2    |
| APAGPSLEETSVSS*PK        | 821.888 | -2.09 | HEATR6;   |       | S643       | Y | NP_071353.4    |
| KAPAGPSLEETSVSS*PK       | 888.945 | -2.00 | HEATR6;   |       | S643       | Y | NP_071353.4    |
| LSSSGAPPADFPS*PR         | 783.354 | -1.77 | HELB;     |       | S967       | Y | NP_387467.2    |
| RIS*SSSVQPCSEEVSTPQDSLAC | 959.431 | 1.28  | HELZ;     |       | S1763      | Y | NP_055692.2    |
| KLEKEEEEGISQES*S*EEEQ    | 799.648 | -1.37 | HMGA1;    |       | S91, S92   | Y | NP_665912.1    |
| KPAQEETEETS*SQESAEED     | 1102.42 | -1.69 | HMGA2;    |       | S101       | Y | NP_003474.1    |
| M^GLAM^GGGGGAS*FDR       | 753.294 | 4.06  | HNRNPM;   |       | S579       | Y | NP_112480.2    |
| APQQQPPPQQPPPPQPPQPPF    | 1136.89 | -1.83 | HNRNPUL1; |       | S718       | Y | NP_008971.2    |
| SPS*PLVSLQAVK            | 653.345 | -2.09 | HPS5;     |       | S420       | Y | NP_852609.1    |
| QLS*SGVSEIR              | 578.275 | 1.92  | HSPB1;    |       | S82        | Y | NP_001531.1    |
| LLSPQM^S*GEEEDSDLAAK     | 1011.44 | 2.47  | HTT;      | 1.056 | S1876      | Y | NP_002102.4    |
| LLSPQMS*GEEEDSDLAAK      | 1003.44 | 3.34  | HTT;      |       | S1876      | Y | NP_002102.4    |
| TDSQSVRHS*PIAPSS*PSPQVLA | 892.413 | -2.23 | INCENP;   |       | S306, S312 | Y | NP_064623.2    |
| LSST*PPLSALGR            | 639.827 | -1.44 | INTS1;    |       | T83        | Y | NP_001073922.: |
| TAS*EGDGGAAAGAAAAGAR     | 806.342 | -2.81 | IRS2;     |       | S365       | Y | NP_003740.2    |
| LQALKEEPQTVPEM^PGETPPLS  | 1196.89 | -1.86 | JUN;      |       | S243       | Y | NP_002219.1    |
| NSDLLTS*PDVGLLK          | 779.398 | 2.07  | JUN;      |       | S63        | Y | NP_002219.1    |
| NSDLLT*SPDVGLLK          | 776.388 | 2.13  | JUN;      |       | T62        | Y | NP_002219.1    |
| AKNSDLLTS*PDVGLLK        | 881.974 | 2.35  | JUN;      |       | S63        | Y | NP_002219.1    |
| ALAM^PGRPES*PPVFR        | 860.916 | -1.97 | KANK2;    |       | S375       | Y | NP_056308.2    |
| SPS*GGAAGPLLTPSQSLDGSR   | 1017.98 | -2.13 | KCTD12;   | 1.079 | S187       | Y | NP_612453.1    |
| SGS*MDPSGAHPSVR          | 732.801 | -1.04 | KHDRBS1;  | 1.060 | S20        | Y | NP_006550.1    |
| LGDAS*DTEAADGER          | 743.789 | -1.01 | KIAA0284; |       | S1065      | Y | NP_055820.1    |
| HTGM^ASIDSSAPETTSDSS*PTL | 844.359 | 1.13  | KIAA0913; |       | S1161      | Y | NP_055852.2    |
| VPGEDGTLPTTQGS*PLR       | 900.931 | -1.18 | KIAA0947; |       | S255       | Y | NP_056140.1    |
| RPPS*PPGPEER             | 649.799 | -2.38 | KIAA1211; |       | S1017      | N | NP_065773.1    |
| SIS*LSQSAENVPASK         | 802.388 | 1.53  | KIAA1432; |       | S938       | Y | NP_065880.1    |
| ALS*GRAS*PVPAPSSGLHAAVR  | 721.016 | -1.79 | KIAA1522; |       | S917, S921 | Y | NP_065939.2    |
| HPLLSSGGPQS*PLR          | 509.256 | -2.19 | KIAA1543; |       | S395       | Y | NP_001073898.  |
| ERPDLAPAGS*PFR           | 859.899 | -3.53 | KIF13B;   |       | S1644      | Y | NP_056069.2    |
| FDLSHGS*PQM^VR           | 735.316 | -1.57 | KSR1;     |       | S197       | Y | NP_055053.1    |
| S*LPTTVPES*PNYR          | 810.84  | -3.79 | LARP1;    | 0.968 | S689, S697 | Y | NP_056130.2    |
| SLPTTVPES*PNYR           | 770.856 | -1.39 | LARP1;    |       | S697       | Y | NP_056130.2    |
| AS*TASPCNNNINAATAVALQEPF | 817.704 | -2.41 | LARP4;    |       | S600       | Y | NP_954658.1    |
| VLGSEGEDEALS*PAK         | 923.409 | -1.53 | LIG1;     | 0.983 | S76        | Y | NP_000225.1    |
| SPGAGSLGS*PASQR          | 676.304 | -1.72 | LIMK1;    |       | S310       | Y | NP_002305.1    |

|                          |          |       |           |       |                 |   |               |
|--------------------------|----------|-------|-----------|-------|-----------------|---|---------------|
| VTTEIQLPSQS*PVEEQSPASLSS | 1382.18  | 3.00  | LMO7;     |       | S533            | Y | NP_005349.3   |
| RSS*GFISELPSEEGK         | 859.903  | -1.10 | LRRRC16A; |       | S968            | Y | NP_060110.3   |
| RGS*GDTSIDTEASIR         | 932.932  | -1.19 | LRRFIP1;  |       | S88             | Y | NP_001131023. |
| LSKS*QGEEEEGPLSDK        | 870.889  | -2.44 | MAF1;     |       | S75             | Y | NP_115648.2   |
| VQSLEGEKLS*PKS*DISPLT*PR | 841.052  | -1.77 | MAP1B;    | 0.935 | S1779, S1782, T | Y | NP_005900.2   |
| SDIS*PLTPR               | 533.253  | 1.22  | MAP1B;    |       | S1785           | Y | NP_005900.2   |
| SGTSTPTTPGSTAITPGT*PPSYS | 830.047  | -1.69 | MAP2;     |       | T306            | Y | NP_001034627. |
| VGS*LDNVGHLPAAGAVK       | 835.917  | -4.86 | MAP4;     | 0.947 | S1073           | Y | NP_002366.2   |
| KCS*LPAEEDSVLEK          | 848.899  | -4.01 | MAP4;     |       | S636            | Y | NP_002366.2   |
| LSSSSATLLNS*PDR          | 764.357  | -1.21 | MAP7;     |       | S209            | Y | NP_003971.1   |
| LSASTASELS*PK            | 638.811  | -1.28 | MAP7D1;   | 0.854 | S460            | Y | NP_060537.3   |
| HTDDEMTGY*VATR           | 788.312  | 2.87  | MAPK14;   | 0.974 | Y182            | Y | NP_620582.1   |
| GPVS*PSVSFQPLAR          | 761.377  | 1.47  | MAVS;     | 1.034 | S222            | Y | NP_065797.2   |
| SS*VKTPEPVVPTAPEPHPTTSTL | 1039.53  | 1.42  | MDC1;     | 0.958 | S1605           | N | NP_055456.2   |
| SSVKT*PEPVVPTAPELQPSTSTL | 1302.63  | 1.55  | MDC1;     |       | T1239           | N | NP_055456.2   |
| LLSSNEDDANILSS*PTDR      | 1013.95  | -1.26 | MED24;    |       | S860            | Y | NP_001072986. |
| LLS*SNEDDANILSSPTDR      | 1013.95  | 2.55  | MED24;    |       | S849            | Y | NP_001072986. |
| APS*AS*PLALHASR          | 719.319  | -2.85 | MICALL1;  |       | S484, S486      | Y | NP_203744.1   |
| VEQM^PQAS*PGLAPR         | 789.356  | -1.28 | MICALL1;  |       | S578            | Y | NP_203744.1   |
| KADT*EEEFALFR            | 767.8392 | 1.26  | MKI67;    |       | T1764           | Y | NP_002408.3   |
| IACKS*PPPESM^DTPPTSTR    | 690.2959 | 1.37  | MKI67;    |       | S2105           | Y | NP_002408.3   |
| TPVQYSQQQNS*PQK          | 856.3823 | 2.21  | MKI67;    |       | S357            | Y | NP_002408.3   |
| IPCES*PPLEVVDTTASTKR     | 726.677  | 2.35  | MKI67;    |       | S2708           | Y | NP_002408.3   |
| M^PCESS*PPESADTPTSTR     | 681.9278 | 2.73  | MKI67;    |       | S1376           | Y | NP_002408.3   |
| TQVLS*PDSLFTAK           | 746.874  | 1.29  | MLLT4;    |       | S1731           | Y | NP_001035090. |
| S*PSVAAM^ASPQLCR         | 785.842  | -1.90 | MPST;     |       | S15             | N | NP_066949.2   |
| VAPVINN~GSPT*ILGK        | 780.906  | -3.21 | MTA1;     |       | T578            | Y | NP_004680.2   |
| VAPVINNGS*PTILGK         | 780.906  | -1.70 | MTA1;     |       | S576            | Y | NP_004680.2   |
| SY*DNLTTACDNTVPLASR      | 1039.45  | -2.48 | MTMR3;    |       | Y614            | Y | NP_066576.1   |
| S*DEEVDGKADGAEAKPAE      | 949.389  | 1.69  | MYH9;     | 1.022 | S1943           | Y | NP_002464.1   |
| LDGLVET*PTGYIESLPR       | 970.475  | -2.35 | NAP1L1;   |       | T62             | Y | NP_631946.1   |
| SPSPGGPQLS*PQLPR         | 799.391  | -2.30 | NCKAP5L;  |       | S477            | Y | NP_001032895. |
| ASGLLKS*PASLK            | 626.34   | 2.59  | NEK4;     |       | S340            | Y | NP_003148.2   |
| SPS*PAVPLR               | 502.253  | -2.32 | NFRKB;    |       | S253            | Y | NP_006156.2   |
| NYSS*PPPCHLSR            | 747.814  | -1.96 | NFX1;     |       | S50             | Y | NP_667344.1   |
| TPSPKEEDEEPES*PPEK       | 1002.92  | -1.75 | NUCKS1;   |       | S214            | Y | NP_073568.2   |
| TSQLGDS*PFYPGK           | 741.835  | 1.93  | NUP153;   |       | S257            | Y | NP_005115.2   |
| VQM^TS*PSSTGSPM^FK       | 851.862  | 2.65  | NUP153;   |       | S516            | Y | NP_005115.2   |
| RGAPSS*PATGVLPSP*PQGK    | 628.299  | 2.30  | NUP188;   | 1.014 | S1709, S1717    | Y | NP_056169.1   |
| CALSS*PSLAFTPIIK         | 837.918  | 1.95  | NUP35;    | 0.890 | S259            | Y | NP_612142.2   |

|                          |         |       |              |       |              |   |                |
|--------------------------|---------|-------|--------------|-------|--------------|---|----------------|
| NSESESNKVAETQS*PSLFGST   | 830.72  | 1.88  | NUP50;       |       | S221         | Y | NP_009103.2    |
| SFSLASSNS*PISQR          | 824.373 | -1.41 | OSBPL11;     |       | S181         | Y | NP_073613.2    |
| SFSLASS*NSPISQR          | 829.377 | -1.18 | OSBPL11;     |       | S179         | Y | NP_073613.2    |
| KTEVVMNSQQT*PVGT*PK      | 1008.47 | -2.88 | PALM;        | 1.520 | T141, T145   | Y | NP_001035224.  |
| KTEVVM*NSQQT*PVGT*PK     | 677.981 | -2.70 | PALM;        |       | T141, T145   | Y | NP_001035224.  |
| KTEVVMNSQQT*PVGT*PK      | 645.994 | -2.65 | PALM;        |       | T145         | Y | NP_001035224.  |
| ESVSTASDQPSHS*LER        | 905.387 | -1.57 | PARD3;       |       | S973         | N | NP_062565.2    |
| SQAN~GAGALSYVS*PNTSK     | 916.907 | -2.08 | PARN;        | 1.016 | S102         | Y | NP_001127949.  |
| RSTS*PIIGS*PPVR          | 733.886 | -2.15 | PATL1;       |       | S179, S184   | Y | NP_689929.2    |
| YKSTT*SVSEEDVSSR         | 590.931 | 1.95  | PAWR;        | 0.970 | T230         | N | NP_002574.2    |
| PSSS*PVIFAGGQDR          | 749.341 | 1.62  | PCBP2;       |       | S189         | Y | NP_001122383.  |
| YM^SQM^S*VPEQAELEK       | 944.397 | 3.76  | PCM1;        | 0.769 | S93          | Y | NP_006188.3    |
| YM^SQMS*VPEQAELEK        | 936.399 | 3.84  | PCM1;        |       | S93          | Y | NP_006188.3    |
| AQNEFKDEAQLSHS*PK        | 669.979 | -2.87 | PDZD8;       |       | S521         | Y | NP_776152.1    |
| TAS*QEGCQELTQEQR         | 922.878 | 2.20  | PEX1;        |       | S1181        | Y | NP_000457.1    |
| AQS*YDIQAWKK             | 715.35  | 2.08  | PHIP;        | 1.048 | S1315        | Y | NP_060404.3    |
| SALLTQNGTGS*LPR          | 747.87  | -1.91 | PHLDB1;      |       | S1017        | Y | NP_055972.1    |
| AHLTVGQAAAGGS*GNLLTER    | 1001.99 | -2.62 | PKP2;        | 0.882 | S329         | Y | NP_001005242.: |
| YARS*EIVGVSR             | 668.83  | -1.87 | PKP2;        |       | S197         | Y | NP_001005242.: |
| RLEIS*PDSSPER            | 743.347 | 1.42  | PKP2;        |       | S151         | Y | NP_001005242.: |
| AGGLDWPEATEVS*PSR        | 876.386 | -2.41 | PKP3;        |       | S238         | Y | NP_009114.1    |
| AVS*PPHLDGPPS*PR         | 793.842 | -1.69 | PML;LOC6526; |       | S518, S527   | Y | NP_150241.2    |
| TPESQPD*PPGT*PLVSQDEKR   | 813.688 | -2.26 | PNKP;        |       | T118, T122   | Y | NP_009185.2    |
| YSPTS*PTYST*TPK          | 843.839 | -2.46 | POLR2A;      | 1.029 | S1878, T1884 | Y | NP_000928.1    |
| VGS*GSLDNLGR             | 577.764 | -2.21 | PPFIA1;      |       | S666         | Y | NP_803172.1    |
| VLS*PTAAKPSPFEGK         | 804.906 | 1.05  | PPP1R10;     | 1.087 | S313         | Y | NP_002705.2    |
| TGS*SGALGPPER            | 604.77  | -1.82 | PPP1R12C;    |       | S427         | Y | NP_060077.1    |
| SIDDEITEAKS*GTAT*PQR     | 1047.95 | -3.12 | PRKAA1;      |       | S501, T505   | Y | NP_996790.3    |
| M^PPLIADS*PK             | 582.773 | -3.59 | PRKAA2;      |       | S377         | Y | NP_006243.2    |
| MPPLIADS*PK              | 574.775 | -3.17 | PRKAA2;      |       | S377         | Y | NP_006243.2    |
| ITS*PLM^EPSSIEK          | 767.365 | 1.01  | PSMA5;       | 1.020 | S56          | Y | NP_002781.2    |
| TVGT*PIASVPGSTNTGTVPGSEI | 1139.52 | 1.12  | PSMD1;       |       | T273         | Y | NP_002798.2    |
| ANVSS*PHREFPPATAR        | 612.961 | 1.02  | PSMF1;       | 0.956 | S153         | Y | NP_006805.2    |
| KAPPPPIS*PTQLSDVSSPR     | 690.692 | 1.67  | RAI14;       |       | S281         | N | NP_056392.1    |
| HFSQS*EETGNEVFGALNEEQPL  | 932.416 | -1.94 | RALGAPA1;    | 0.894 | S775         | Y | NP_055805.1    |
| SAAS*REDLVGPEVGAS*PQSGR  | 795.367 | -1.78 | RALGPS2;     |       | S296, S308   | Y | NP_689876.2    |
| EALGLGPPAAQLT*PPPAPVGLR  | 1101.59 | -1.17 | RAVER1;      | 0.974 | T480         | Y | NP_597709.2    |
| TAVIPINGS*PRT*PR         | 819.892 | -2.16 | RB1;         |       | S249, T252   | Y | NP_000312.2    |
| LEVTEIVKPS*PK            | 710.379 | -1.84 | RBBP6;       |       | S1145        | Y | NP_061173.1    |
| VIADS*DAES*PAKR          | 824.372 | -1.11 | RBL1;        |       | S1037, S1041 | N | NP_002886.2    |

|                         |         |       |             |       |              |   |                |
|-------------------------|---------|-------|-------------|-------|--------------|---|----------------|
| YIKENS*PCVT*PVSTATHSLSR | 841.716 | -2.69 | RBL2;       |       | S413, T417   | Y | NP_005602.3    |
| HRHS*PTGPPGFPR          | 508.241 | -1.66 | RBM10;      |       | S89          | Y | NP_005667.2    |
| LGASNS*PGQPNSVKR        | 796.876 | -1.61 | RBM25;      | 1.083 | S677         | Y | NP_067062.1    |
| DSYS*SSRSDLYSSGR        | 589.577 | -1.99 | RBMX;LOC100 |       | S328         | Y | NP_002130.2    |
| SVWGLAVQNS*PK           | 729.858 | -1.34 | RDBP;       | 0.911 | S353         | Y | NP_002895.3    |
| SIS*ADDDLQESSR          | 751.805 | 2.25  | RDBP;       |       | S115         | Y | NP_002895.3    |
| SLS*EQPVM^DTATATEQAK    | 996.951 | 2.80  | RDBP;       |       | S51          | Y | NP_002895.3    |
| SLS*EQPVM^DTATATEQAK    | 1004.95 | 2.98  | RDBP;       |       | S51          | Y | NP_002895.3    |
| S*LSEQPVM^DTATATEQAK    | 1004.95 | 3.10  | RDBP;       |       | S49          | Y | NP_002895.3    |
| NLS*GSTLYPVSNIPR        | 849.417 | -2.16 | RFX7;       |       | S1178        | Y | NP_073752.5    |
| ALVVPEPEPDS^SDS*NQER    | 981.429 | -1.65 | RNF20;      | 1.010 | S138         | Y | NP_062538.5    |
| ILKS*PEIQ~R             | 590.82  | -1.81 | RPL4;       | 0.998 | S295         | Y | NP_000959.2    |
| KAEAGAGS*ATEFQFR        | 833.384 | -1.80 | RPS10;      | 0.953 | S146         | Y | NP_001005.1    |
| VLDTSSLTQS*APAS*PTNK    | 991.945 | -1.66 | RPTOR;      |       | S859, S863   | Y | NP_065812.1    |
| TPTSS*PASS*PLVAK        | 754.841 | -1.72 | RRP1B;      | 0.993 | S732, S736   | Y | NP_055871.1    |
| TPTSS*PASS*PLVAK        | 714.858 | -1.12 | RRP1B;      |       | S732         | Y | NP_055871.1    |
| SILVS*PTGPSR            | 597.301 | 1.08  | RRP1B;      |       | S706         | Y | NP_055871.1    |
| DSAPSTPTS*PTEFLTPGLR    | 1027.48 | 1.70  | SACS;       |       | S4264        | Y | NP_055178.3    |
| SVVS*FDKVK              | 550.794 | -1.86 | SAFB;       |       | S604         | Y | NP_002958.2    |
| KDDVS*PVMQFSSK          | 780.365 | 1.76  | SCYL3;      |       | S653         | N | NP_065156.5    |
| FDS*PRGPPPPR            | 441.544 | -1.47 | SENP3;      |       | S188         | Y | NP_056485.2    |
| ILEQQNSSRT*LEK          | 821.413 | -1.25 | SEPT7;      |       | T425         | Y | NP_001011553.: |
| SSLGQS*AS*ETEEDTVSVSK   | 1053.93 | 1.00  | SF3B2;      | 0.994 | S307, S309   | Y | NP_006833.2    |
| SSLGQS*AS*ETEEDTVSVSKK  | 1120.98 | 1.25  | SF3B2;      |       | S307, S309   | Y | NP_006833.2    |
| SEEKIS*DSEGFK           | 724.324 | 1.11  | SFPQ;       | 1.115 | S273         | Y | NP_005057.1    |
| LTRPAAS*PAVGEK          | 696.865 | -1.55 | SFRS16;     |       | S547         | Y | NP_008987.2    |
| TLS*SSAQEDIIR           | 700.327 | 2.48  | SH2D4A;     |       | S315         | Y | NP_071354.2    |
| ANS*PSLFGTEGKPK         | 756.859 | -2.37 | SH3KBP1;    |       | S587         | Y | NP_114098.1    |
| HGS*PEFCGILGER          | 769.827 | -1.87 | SHB;        |       | S388         | Y | NP_003019.2    |
| S*GSDAGEARPPTPASPR      | 876.895 | 2.13  | SIPA1;      |       | S53          | Y | NP_694985.29   |
| AGAGM^ITQHSSNAS*PINR    | 954.426 | -2.00 | SLTM;       |       | S1002        | Y | NP_079031.2    |
| AGAGMITQHSSNAS*PINR     | 631.288 | -1.78 | SLTM;       |       | S1002        | Y | NP_079031.2    |
| GGGGGQDNGLEGLGND^R      | 870.353 | -1.99 | SNRNP70;    | 1.024 | S410         | Y | NP_003080.2    |
| SAAS*PVVSSM^PER         | 707.308 | -2.05 | SON;        | 0.924 | S1769        | Y | NP_115571.1    |
| SVESTS*PEPSKIM^LVEPPVAK | 774.384 | 1.67  | SON;        |       | S283         | Y | NP_115571.1    |
| SRLT*PVSPSSSTEEK        | 915.429 | -3.05 | SQSTM1;     |       | T269         | Y | NP_003891.1    |
| SGS*SQELDVKPSAS*PQER    | 661.301 | -2.28 | SRRM2;      | 0.992 | S1541, S1552 | Y | NP_057417.3    |
| TPAAAAAMNLAS*PR         | 711.335 | 1.35  | SRRM2;      |       | S2272        | Y | NP_057417.3    |
| TPAAAAAM^NLAS*PR        | 719.332 | 1.43  | SRRM2;      |       | S2272        | Y | NP_057417.3    |
| M^SCFS*RPSM^SPTPLDR     | 990.905 | 1.71  | SRRM2;      |       | S2118        | Y | NP_057417.3    |

|                          |          |       |           |       |            |   |               |
|--------------------------|----------|-------|-----------|-------|------------|---|---------------|
| TAVAPSAVNLADPRT*PTAPAVNI | 901.137  | 2.08  | SRRM2;    |       | T2289      | Y | NP_057417.3   |
| LQTTDNLLPMS*PEEFDEVSR    | 1200.532 | 1.24  | STAT1;    | 0.954 | S727       | Y | NP_009330.1   |
| LIEGVHPGSLVEKLPDS*PALAK  | 788.099  | -3.24 | STIM1;    | 0.991 | S575       | Y | NP_003147.2   |
| LPDS*PALAK               | 499.257  | -1.66 | STIM1;    |       | S575       | Y | NP_003147.2   |
| LTSS*CPDLPSQTDKK         | 884.916  | -2.22 | STX17;    |       | S289       | Y | NP_060389.2   |
| DVTNFTVGGFAPMS*PR        | 888.395  | -1.32 | SUPT5H;   |       | S666       | Y | NP_001104490. |
| M^DSNFGLAGLPGS*PK        | 793.85   | -1.01 | SUV39H1;  |       | S391       | Y | NP_003164.1   |
| RADNCS*PVAEEETTGSAAESTLP | 843.699  | -2.77 | TANC1;    |       | S270       | Y | NP_203752.1   |
| TAANKS*PCETISS*PSSTLESK  | 763.024  | -2.02 | TANC1;    |       | S207, S214 | Y | NP_203752.1   |
| TEEARPSPAPGPGT*PTGTPTTR  | 726.343  | -2.46 | TBC1D10B; |       | T148       | N | NP_056342.3   |
| SQS*LPHSATVTLGGTSDPSTLS  | 985.132  | 1.60  | TBC1D22A; |       | S167       | N | NP_055161.1   |
| AFSS*PQEEEEAGFTGR        | 911.371  | 2.91  | TCEB3;    |       | S542       | Y | NP_003189.2   |
| SPAGPAATPAQAQAAS*PR      | 920.435  | -1.09 | TCOF1;    |       | T983       | Y | NP_001008656. |
| NDAPTPGTSTT*PGLR         | 782.854  | -1.74 | TLE3;     |       | T334       | Y | NP_005069.2   |
| GPPDFSSDEEREPT*PVLGSGAA  | 884.065  | -2.10 | TMPO;     | 1.008 | T74        | Y | NP_001027454. |
| SST*PLPTISSSAENTR        | 869.401  | -1.16 | TMPO;     |       | T160       | Y | NP_001027454. |
| LGSQPIRAS*NPDLR          | 812.41   | -1.08 | TNIK;     |       | S707       | Y | NP_055843.1   |
| HNGSL*PGLEAR             | 664.798  | 1.27  | TNKS1BP1; |       | S1385      | Y | NP_203754.2   |
| AADRLPNLSS*PSAEGPPGPPSG  | 859.082  | 2.82  | TOM1;     |       | S462       | Y | NP_005479.1   |
| IDEDGENTQIEDTEPM^S*PVLNS | 1329.06  | -2.09 | TP53BP1;  |       | S557       | Y | NP_001135451. |
| VLLS*PSIPSVGQDQTLSPGSK   | 1098.57  | 2.90  | TP53BP2;  |       | S433       | Y | NP_005417.1   |
| N~SATFKS*FEDR            | 699.8    | 2.89  | TPD52L2;  |       | S189       | Y | NP_955392.1   |
| EGVQGPLNV*S*LSEEGK       | 861.902  | -1.87 | TPR;      | 0.988 | S1185      | Y | NP_003283.2   |
| VPVNULLNS*PDCDVK         | 828.395  | 1.21  | TTK;      |       | S281       | Y | NP_003309.2   |
| RYPSSISS*S*PQKDLTQAK     | 699.022  | -2.33 | UBAP2L;   | 0.984 | S608, S609 | Y | NP_001120792. |
| M^EISAELPQT*PQR          | 798.361  | -1.60 | UBR1;     |       | T21        | Y | NP_777576.1   |
| SESLIDASEDS*QLEAAIR      | 1007.45  | -1.89 | UBXN7;    | 1.050 | S288       | Y | NP_056377.1   |
| DSALAEAPEGLS*PAPPAR      | 914.928  | -1.55 | USP42;    |       | S856       | Y | NP_115548.1   |
| STETSDFENIES*PLNER       | 1024.43  | -1.65 | USP47;    | 0.850 | S822       | Y | NP_060414.3   |
| S*DVSPIIQPVPSIK          | 783.418  | 2.22  | USP8;     |       | S389       | Y | NP_001122082. |
| SHILEDDENS*VDISM^LK      | 1023.96  | -1.59 | WDHD1;    | 1.012 | S260       | Y | NP_001008397. |
| TQSRPGGPPNPPGPS*PK       | 584.281  | -1.80 | WIZ;      |       | S249       | Y | NP_067064.2   |
| NYQQNYQNS*ESGEKNEGSESA   | 1118.47  | -1.02 | YBX1;     | 1.060 | S165       | Y | NP_004550.2   |
| QPGQVIGATTPTSTGS*PTNK    | 960.957  | -1.86 | YEATS2;   |       | S519       | Y | NP_060493.3   |
| SSQQPST*PQQAPPQPQQGTF    | 904.425  | -1.98 | ZC3H18;   |       | T796       | Y | NP_653205.2   |
| LGVS*VS*PSR              | 491.243  | -1.74 | ZC3H18;   |       | S532, S534 | Y | NP_653205.2   |
| S*SLGSLQTPEAVTTR         | 813.891  | -3.08 | ZC3HAV1;  | 0.946 | S386       | Y | NP_078901.3   |
| SCT*PSPDQISHR            | 732.801  | -1.82 | ZC3HAV1;  |       | T273       | Y | NP_078901.3   |
| IHS*PIPDMSK              | 605.786  | 1.35  | ZCCHC8;   |       | S658       | Y | NP_060082.2   |
| RIS*TSDILSEK             | 672.841  | 1.78  | ZFC3H1;   |       | S352       | Y | NP_659419.3   |

|                         |         |       |          |       |          |   |             |
|-------------------------|---------|-------|----------|-------|----------|---|-------------|
| NEIIQS*PISQVPSVEK       | 927.472 | 1.62  | ZFYVE16; |       | S939     | Y | NP_055548.3 |
| NQKQPGVDSLS*PVASLPK     | 653.012 | 1.77  | ZMYM2;   |       | S305     | Y | NP_003444.1 |
| TEEPLGS*PHPSGTVESPGEGPC | 881.053 | -2.45 | ZNF446;  |       | S137     | Y | NP_060378.1 |
| KLANDFPLDLS*PVK         | 818.922 | -1.92 | ZNF462;  |       | S688     | Y | NP_067047.4 |
| ATDIPASAS*PPPVAGVPFFK   | 1025.01 | -2.74 | ZNF687;  |       | S253     | Y | NP_065883.1 |
| S*PGLVPPS*PEFAPR        | 805.855 | -2.36 | ZNF768;  |       | S90, S97 | Y | NP_078947.3 |
| S*PGAPGPLTLK            | 562.297 | 1.16  | ZYX;     | 1.020 | S344     | Y | NP_003452.1 |

**Protein annotation****Link to known function**

actin-binding LIM protein 1 isoform a [Homo sapiens]  
acetyl-Coenzyme A carboxylase alpha isoform 1 [Homo sapiens]  
acyl-Coenzyme A binding domain containing 5 isoform 1 [Homo sapiens]  
apoptotic chromatin condensation inducer 1 [Homo sapiens]  
adenosine deaminase, RNA-specific isoform a [Homo sapiens]  
ALL1 fused gene from 5q31 [Homo sapiens]  
HIV-1 Rev binding protein isoform 2 [Homo sapiens]  
AHNAK nucleoprotein isoform 1 [Homo sapiens]  
alpha-2-HS-glycoprotein [Homo sapiens]  
A kinase (PRKA) anchor protein 12 isoform 2 [Homo sapiens]  
AKT1 substrate 1 (proline-rich) [Homo sapiens] <http://www.phosphosite.org/proteinAction.do?id=6306&showAllSites=true>  
alkB, alkylation repair homolog 5 [Homo sapiens] <http://www.phosphosite.org/proteinAction.do?id=16708&showAllSites=true>  
probable alpha-ketoglutarate-dependent dioxygenase ABH5 [Homo sapiens]  
ankyrin repeat and sterile alpha motif domain containing 1 [Homo sapiens]  
anillin, actin binding protein [Homo sapiens]  
Rho GTPase activating protein 1 [Homo sapiens]  
Rho GTPase activating protein 27 [Homo sapiens]  
Rho-specific guanine nucleotide exchange factor p114 isoform 1 <http://www.phosphosite.org/proteinAction.do?id=13377&showAllSites=true>  
AT rich interactive domain 1A isoform a [Homo sapiens] <http://www.phosphosite.org/proteinAction.do?id=7952&showAllSites=true>  
AT rich interactive domain 1A isoform a [Homo sapiens] <http://www.phosphosite.org/proteinAction.do?id=7952&showAllSites=true>  
activating transcription factor 2 [Homo sapiens]  
activating transcription factor 7 isoform 3 [Homo sapiens]  
activating transcription factor 7 interacting protein [Homo sapiens]  
ataxia telangiectasia mutated protein isoform 1 [Homo sapiens]  
plasma membrane calcium ATPase 1 isoform 1b [Homo sapiens]  
BCL2-associated athanogene 3 [Homo sapiens]  
HLA-B associated transcript-2 [Homo sapiens]  
tyrosine-protein kinase BAZ1B [Homo sapiens]  
B-cell CLL/lymphoma 7C [Homo sapiens]  
bromodomain containing 2 [Homo sapiens]

bromodomain containing 2 [Homo sapiens]  
bromodomain and WD repeat domain containing 1 isoform A [Homo sapiens]  
BUD13 homolog [Homo sapiens]  
BUD13 homolog isoform 1 [Homo sapiens]  
hypothetical protein LOC55004 [Homo sapiens]  
chromosome 12 open reading frame 51 [Homo sapiens]  
PTIP-associated 1 protein [Homo sapiens]  
ARKadia-like 1 isoform a [Homo sapiens]  
hypothetical protein LOC56006 [Homo sapiens]  
hypothetical protein LOC29058 isoform 2 [Homo sapiens]  
ashwin [Homo sapiens]  
ashwin [Homo sapiens]  
ashwin [Homo sapiens]  
hypothetical protein LOC79886 [Homo sapiens]  
hypothetical protein LOC79886 [Homo sapiens]  
calmodulin regulated spectrin-associated protein 1-like 1 [Homo sapiens]  
Cdc42 effector protein 3 [Homo sapiens]  
cell division cycle 2-like 5 isoform 2 [Homo sapiens]  
centrosomal protein 170kDa isoform alpha [Homo sapiens]  
centrosomal protein 170kDa isoform alpha [Homo sapiens]  
chromatin assembly factor 1 subunit B [Homo sapiens] <http://www.phosphosite.org/proteinAction.do?id=5879&showAllSites=true>  
CLIP-associating protein 1 isoform 2 [Homo sapiens]  
CLIP-associating protein 1 isoform 1 [Homo sapiens] <http://www.phosphosite.org/proteinAction.do?id=6179&showAllSites=true>  
restin isoform a [Homo sapiens]  
cyclin M3 isoform 2 [Homo sapiens]  
cAMP responsive element binding protein 5 isoform alpha [Homo sapiens]  
catenin (cadherin-associated protein), beta 1, 88kDa [Homo sapiens]  
catenin beta-1 [Homo sapiens] <http://www.phosphosite.org/proteinAction.do?id=454&showAllSites=true>  
catenin, delta 1 isoform 3ABC [Homo sapiens]  
cortactin isoform a [Homo sapiens]  
cortactin isoform a [Homo sapiens] <http://www.phosphosite.org/proteinAction.do?id=1192&showAllSites=true>  
spectrin domain with coiled-coils 1 NSP5b3b [Homo sapiens]  
death-domain associated protein isoform b [Homo sapiens]  
IQ motif and WD repeats 1 isoform a [Homo sapiens]  
DCP1 decapping enzyme homolog A [Homo sapiens]  
decapping enzyme Dcp1b [Homo sapiens] <http://www.phosphosite.org/proteinAction.do?id=2681&showAllSites=true>  
DENN/MADD domain containing 4C [Homo sapiens]  
DENN/MADD domain containing 5B [Homo sapiens]  
discs, large homolog 1 isoform 2 [Homo sapiens]  
DNA methyltransferase 1 associated protein 1 [Homo sapiens]

dynamain 1-like protein isoform 1 [Homo sapiens]  
deoxynucleotidyltransferase, terminal, interacting protein 2 [Homo sapiens] <http://www.phosphosite.org/proteinAction.do?id=9379&showAllSites=true>  
dedicator of cytokinesis 7 [Homo sapiens]  
zinc finger protein ubi-d4 [Homo sapiens]  
desmoglein 2 preproprotein [Homo sapiens]  
dynein, cytoplasmic 1, light intermediate chain 1 [Homo sapiens] <http://www.phosphosite.org/proteinAction.do?id=2988&showAllSites=true>  
dynein, cytoplasmic 1, light intermediate chain 1 [Homo sapiens]  
dynein, cytoplasmic 1, light intermediate chain 1 [Homo sapiens] <http://www.phosphosite.org/proteinAction.do?id=2988&showAllSites=true>  
dynein, cytoplasmic 1, light intermediate chain 1 [Homo sapiens]  
dynein, cytoplasmic 1, light intermediate chain 1 [Homo sapiens] <http://www.phosphosite.org/proteinAction.do?id=2988&showAllSites=true>  
enhancer of mRNA decapping 3 [Homo sapiens]  
EF-hand domain-containing protein D2 [Homo sapiens]  
epidermal growth factor receptor isoform a precursor [Homo sapiens]  
egl nine homolog 1 [Homo sapiens]  
eukaryotic translation initiation factor 3, subunit 9 eta, 116kDa [Homo sapiens]  
eukaryotic translation initiation factor 4E binding protein 1 [Homo sapiens]  
eukaryotic translation initiation factor 4 gamma 2 isoform 1 [Homo sapiens]  
erythrocyte membrane protein band 4.1-like 3 [Homo sapiens]  
erythrocyte membrane protein band 4.1-like 3 [Homo sapiens] <http://www.phosphosite.org/proteinAction.do?id=3467&showAllSites=true>  
erythrocyte membrane protein band 4.1-like 3 [Homo sapiens]  
epiplakin 1 [Homo sapiens]  
epiplakin 1 [Homo sapiens] <http://www.phosphosite.org/proteinAction.do?id=8674&showAllSites=true>  
epiplakin 1 [Homo sapiens]  
epidermal growth factor receptor pathway substrate 15 [Homo sapiens] <http://www.phosphosite.org/proteinAction.do?id=4549&showAllSites=true>  
amyotrophic lateral sclerosis 2 (juvenile) chromos  
hypothetical protein LOC116224 [Homo sapiens]  
FERM, RhoGEF and pleckstrin domain-containing protein 1 isoform 1 [Homo sapiens]  
hypothetical protein LOC55701 [Homo sapiens]  
forkhead box C1 [Homo sapiens]  
forkhead box K2 [Homo sapiens] <http://www.phosphosite.org/proteinAction.do?id=16478&showAllSites=true>  
FERM domain containing 6 [Homo sapiens]  
galanin preproprotein [Homo sapiens]  
GATA zinc finger domain containing 2B [Homo sapiens]  
GATA zinc finger domain containing 2B [Homo sapiens]  
GRB10 interacting GYF protein 2 isoform b [Homo sapiens] <http://www.phosphosite.org/proteinAction.do?id=6171&showAllSites=true>  
GEM interacting protein [Homo sapiens]  
golgi reassembly stacking protein 2 [Homo sapiens]  
G patch domain and KOW motifs [Homo sapiens]  
G protein-coupled receptor 137C [Homo sapiens] <http://www.phosphosite.org/proteinAction.do?id=15672287&showAllSites=true>  
general transcription factor IIF subunit 1 [Homo sapiens] <http://www.phosphosite.org/proteinAction.do?id=8665&showAllSites=true>

family with sequence similarity 29, member A [Homo sapiens] <http://www.phosphosite.org/proteinAction.do?id=13449&showAllSites=true>  
family with sequence similarity 29, member A [Homo sapiens]  
host cell factor 1 [Homo sapiens]  
host cell factor 1 [Homo sapiens]  
HEAT repeat containing 6 [Homo sapiens]  
HEAT repeat containing 6 [Homo sapiens]  
helicase (DNA) B [Homo sapiens]  
helicase with zinc finger domain [Homo sapiens] <http://www.phosphosite.org/proteinAction.do?id=5834&showAllSites=true>  
high mobility group AT-hook 1 isoform b [Homo sapiens]  
high mobility group AT-hook 2 isoform a [Homo sapiens]  
heterogeneous nuclear ribonucleoprotein M isoform b [Homo sapiens] <http://www.phosphosite.org/proteinAction.do?id=8716&showAllSites=true>  
heterogeneous nuclear ribonucleoprotein U-like 1 isoform a [Homo sapiens] <http://www.phosphosite.org/proteinAction.do?id=2890&showAllSites=true>  
Hermansky-Pudlak syndrome 5 isoform b [Homo sapiens]  
heat shock protein beta-1 [Homo sapiens]  
huntingtin [Homo sapiens]  
huntingtin [Homo sapiens]  
inner centromere protein isoform 2 [Homo sapiens]  
integrator complex subunit 1 [Homo sapiens]  
insulin receptor substrate 2 [Homo sapiens]  
jun oncogene [Homo sapiens] <http://www.phosphosite.org/proteinAction.do?id=943&showAllSites=true>  
jun oncogene [Homo sapiens]  
jun oncogene [Homo sapiens]  
jun oncogene [Homo sapiens]  
ankyrin repeat domain 25 [Homo sapiens]  
potassium channel tetramerisation domain containing 12 [Homo sapiens] <http://www.phosphosite.org/proteinAction.do?id=9130&showAllSites=true>  
KH domain containing, RNA binding, signal transduction associated 1 [Homo sapiens]  
hypothetical protein LOC283638 isoform 2 [Homo sapiens] <http://www.phosphosite.org/proteinAction.do?id=16435&showAllSites=true>  
hypothetical protein LOC23053 [Homo sapiens]  
hypothetical protein LOC23379 [Homo sapiens]  
hypothetical protein LOC57482 [Homo sapiens]  
connexin 43-interacting protein 150 isoform a [Homo sapiens] <http://www.phosphosite.org/proteinAction.do?id=15964&showAllSites=true>  
hypothetical protein LOC57648 [Homo sapiens]  
hypothetical protein LOC57662 isoform 1 [Homo sapiens]  
kinesin family member 13B [Homo sapiens]  
kinase suppressor of ras [Homo sapiens] <http://www.phosphosite.org/proteinAction.do?id=2001&showAllSites=true>  
la-related protein 1 isoform 1 [Homo sapiens]  
la related protein isoform 1 [Homo sapiens]  
c-Mpl binding protein isoform b [Homo sapiens]  
DNA ligase I [Homo sapiens] <http://www.phosphosite.org/proteinAction.do?id=957&showAllSites=true>  
LIM domain kinase 1 [Homo sapiens] <http://www.phosphosite.org/proteinAction.do?id=616&showAllSites=true>

LIM domain only 7 [Homo sapiens]  
leucine rich repeat containing 16A [Homo sapiens]  
leucine rich repeat (in FLII) interacting protein 1 isoform 2 [Homo sapiens]  
MAF1 protein [Homo sapiens] <http://www.phosphosite.org/proteinAction.do?id=9756&showAllSites=true>  
microtubule-associated protein 1B [Homo sapiens]  
microtubule-associated protein 1B [Homo sapiens]  
microtubule-associated protein 2 isoform 5 [Homo sapiens]  
microtubule-associated protein 4 isoform 1 [Homo sapiens]  
microtubule-associated protein 4 isoform 1 [Homo sapiens]  
microtubule-associated protein 7 [Homo sapiens]  
MAP7 domain containing 1 [Homo sapiens]  
mitogen-activated protein kinase 14 isoform 3 [Homo sapiens]  
virus-induced signaling adapter [Homo sapiens] <http://www.phosphosite.org/proteinAction.do?id=15129&showAllSites=true>  
mediator of DNA damage checkpoint 1 [Homo sapiens]  
mediator of DNA damage checkpoint 1 [Homo sapiens]  
mediator complex subunit 24 isoform 2 [Homo sapiens]  
mediator complex subunit 24 isoform 2 [Homo sapiens]  
molecule interacting with Rab13 [Homo sapiens]  
molecule interacting with Rab13 [Homo sapiens] <http://www.phosphosite.org/proteinAction.do?id=5920&showAllSites=true>  
antigen KI-67 isoform 1 [Homo sapiens]  
myeloid/lymphoid or mixed-lineage leukemia (trithorax homolog, Drosophila); translocated to, 4 isoform 1 [Homo sapiens]  
mercaptopyruvate sulfurtransferase isoform 1 [Homo sapiens]  
metastasis associated protein [Homo sapiens]  
metastasis associated protein [Homo sapiens]  
myotubularin-related protein 3 isoform c [Homo sapiens]  
myosin-9 [Homo sapiens]  
nucleosome assembly protein 1-like 1 [Homo sapiens]  
hypothetical protein LOC57701 [Homo sapiens]  
NIMA (never in mitosis gene a)-related kinase 4 [Homo sapiens] <http://www.phosphosite.org/proteinAction.do?id=766&showAllSites=true>  
nuclear factor related to kappaB binding protein [Homo sapiens]  
nuclear transcription factor, X-box binding 1 isoform 2 [Homo sapiens]  
nuclear casein kinase and cyclin-dependent kinase substrate 1 [Homo sapiens]  
nucleoporin 153kDa [Homo sapiens]  
nucleoporin 153kDa [Homo sapiens]  
nucleoporin 188kDa [Homo sapiens]  
nucleoporin 35kDa [Homo sapiens]

nucleoporin 50kDa isoform b [Homo sapiens]  
oxysterol binding protein-like 11 [Homo sapiens]  
oxysterol binding protein-like 11 [Homo sapiens] <http://www.phosphosite.org/proteinAction.do?id=2949&showAllSites=true>  
paralemmin isoform 2 [Homo sapiens] <http://www.phosphosite.org/proteinAction.do?id=3843&showAllSites=true>  
paralemmin isoform 2 [Homo sapiens] <http://www.phosphosite.org/proteinAction.do?id=3843&showAllSites=true>  
paralemmin isoform 2 [Homo sapiens] <http://www.phosphosite.org/proteinAction.do?id=3843&showAllSites=true>  
partitioning-defective protein 3 homolog [Homo sapiens] <http://www.phosphosite.org/proteinAction.do?id=2686&showAllSites=true>  
poly(A)-specific ribonuclease (deadenylation nuclease) isoform 2 [Homo sapiens]  
protein associated with topoisomerase II homolog 1 [Homo sapiens] <http://www.phosphosite.org/proteinAction.do?id=6218&showAllSites=true>  
PRKC, apoptosis, WT1, regulator [Homo sapiens]  
poly(rC)-binding protein 2 isoform d [Homo sapiens]  
pericentriolar material 1 [Homo sapiens] <http://www.phosphosite.org/proteinAction.do?id=3133&showAllSites=true>  
pericentriolar material 1 [Homo sapiens] <http://www.phosphosite.org/proteinAction.do?id=3133&showAllSites=true>  
PDZ domain containing 8 [Homo sapiens]  
peroxin1 [Homo sapiens]  
pleckstrin homology domain interacting protein [Homo sapiens]  
pleckstrin homology-like domain, family B, member 1 [Homo sapiens]  
plakophilin 2 isoform 2a [Homo sapiens] <http://www.phosphosite.org/proteinAction.do?id=6853&showAllSites=true>  
plakophilin 2 isoform 2a [Homo sapiens]  
plakophilin 2 isoform 2a [Homo sapiens]  
plakophilin 3 [Homo sapiens]  
promyelocytic leukemia protein isoform 1 [Homo sapiens]  
polynucleotide kinase 3'-phosphatase [Homo sapiens]  
DNA directed RNA polymerase II polypeptide A [Homo sapiens]  
PTPRF interacting protein alpha 1 isoform a [Homo sapiens]  
protein phosphatase 1, regulatory subunit 10 [Homo sapiens]  
protein phosphatase 1, regulatory subunit 12C [Homo sapiens]  
protein kinase, AMP-activated, alpha 1 catalytic subunit isoform 2 [Homo sapiens]  
AMP-activated protein kinase alpha 2 catalytic subunit [Homo sapiens]  
AMP-activated protein kinase alpha 2 catalytic subunit [Homo sapiens]  
proteasome alpha 5 subunit [Homo sapiens]  
proteasome 26S non-ATPase subunit 1 [Homo sapiens] <http://www.phosphosite.org/proteinAction.do?id=5959&showAllSites=true>  
proteasome inhibitor subunit 1 [Homo sapiens]  
retinoic acid induced 14 [Homo sapiens]  
GTPase activating Rap/RanGAP domain-like 1 isoform 1 [Homo sapiens]  
Ral GEF with PH domain and SH3 binding motif 2 [Homo sapiens]  
RAVER1 [Homo sapiens]  
retinoblastoma 1 [Homo sapiens]  
retinoblastoma-binding protein 6 isoform 2 [Homo sapiens]  
retinoblastoma-like protein 1 isoform a [Homo sapiens] <http://www.phosphosite.org/proteinAction.do?id=4526&showAllSites=true>

retinoblastoma-like 2 (p130) [Homo sapiens]  
RNA binding motif protein 10 isoform 1 [Homo sapiens]  
RNA binding motif protein 25 [Homo sapiens]  
RNA binding motif protein, X-linked [Homo sapiens]  
RD RNA-binding protein [Homo sapiens]  
RD RNA-binding protein [Homo sapiens] <http://www.phosphosite.org/proteinAction.do?id=5808&showAllSites=true>  
RD RNA-binding protein [Homo sapiens]  
RD RNA-binding protein [Homo sapiens] <http://www.phosphosite.org/proteinAction.do?id=5808&showAllSites=true>  
RD RNA-binding protein [Homo sapiens] <http://www.phosphosite.org/proteinAction.do?id=5808&showAllSites=true>  
regulatory factor X domain containing 2 [Homo sapiens]  
ring finger protein 20 [Homo sapiens]  
ribosomal protein L4 [Homo sapiens]  
ribosomal protein S10 [Homo sapiens]  
raptor [Homo sapiens] <http://www.phosphosite.org/proteinAction.do?id=6245&showAllSites=true>  
ribosomal RNA processing 1 homolog B [Homo sapiens]  
ribosomal RNA processing 1 homolog B [Homo sapiens]  
ribosomal RNA processing 1 homolog B [Homo sapiens]  
sacsin [Homo sapiens]  
scaffold attachment factor B [Homo sapiens]  
SCY1-like 3 isoform 1 [Homo sapiens]  
SUMO1/sentrin/SMT3 specific protease 3 [Homo sapiens] <http://www.phosphosite.org/proteinAction.do?id=6967&showAllSites=true>  
cell division cycle 10 isoform 2 [Homo sapiens]  
splicing factor 3B subunit 2 [Homo sapiens] <http://www.phosphosite.org/proteinAction.do?id=2959&showAllSites=true>  
splicing factor 3B subunit 2 [Homo sapiens]  
splicing factor proline/glutamine rich (polypyrimidine tract binding protein associated) [Homo sapiens]  
Splicing factor, arginine/serine-rich 16 [Homo sapiens]  
SH2 domain containing 4A [Homo sapiens]  
SH3-domain kinase binding protein 1 isoform a [Homo sapiens]  
Src homology 2 domain containing adaptor protein B [Homo sapiens]  
signal-induced proliferation-associated protein 1  
modulator of estrogen induced transcription isoform a [Homo sapiens]  
modulator of estrogen induced transcription isoform a [Homo sapiens]  
U1 small nuclear ribonucleoprotein 70 kDa [Homo sapiens]  
SON DNA-binding protein isoform B [Homo sapiens] <http://www.phosphosite.org/proteinAction.do?id=5807&showAllSites=true>  
SON DNA-binding protein isoform B [Homo sapiens]  
sequestosome 1 [Homo sapiens]  
splicing coactivator subunit SRm300 [Homo sapiens]  
splicing coactivator subunit SRm300 [Homo sapiens] <http://www.phosphosite.org/proteinAction.do?id=3140&showAllSites=true>  
splicing coactivator subunit SRm300 [Homo sapiens] <http://www.phosphosite.org/proteinAction.do?id=3140&showAllSites=true>  
splicing coactivator subunit SRm300 [Homo sapiens] <http://www.phosphosite.org/proteinAction.do?id=3140&showAllSites=true>

splicing coactivator subunit SRm300 [Homo sapiens]  
signal transducer and activator of transcription 1 isoform alpha [Homo sapiens]  
stromal interaction molecule 1 precursor [Homo sapiens]  
stromal interaction molecule 1 precursor [Homo sapiens]  
syntaxin 17 [Homo sapiens]  
suppressor of Ty 5 homolog isoform a [Homo sapiens] <http://www.phosphosite.org/proteinAction.do?id=6160&showAllSites=true>  
suppressor of variegation 3-9 homolog 1 [Homo sapiens]  
tetratricopeptide repeat, ankyrin repeat and coiled-coil containing 1 [Homo sapiens]  
tetratricopeptide repeat, ankyrin repeat and coiled-coil containing 1 [Homo sapiens]  
TBC1 domain family member 10B [Homo sapiens]  
TBC1 domain family, member 22A [Homo sapiens] <http://www.phosphosite.org/proteinAction.do?id=20243&showAllSites=true>  
elongin A [Homo sapiens]  
Treacher Collins-Franceschetti syndrome 1 isoform a [Homo sapiens] <http://www.phosphosite.org/proteinAction.do?id=5887&showAllSites=true>  
transducin-like enhancer protein 3 isoform a [Homo sapiens] <http://www.phosphosite.org/proteinAction.do?id=2990&showAllSites=true>  
thymopoietin isoform beta [Homo sapiens]  
thymopoietin isoform beta [Homo sapiens] <http://www.phosphosite.org/proteinAction.do?id=5144&showAllSites=true>  
TRAF2 and NCK interacting kinase [Homo sapiens] <http://www.phosphosite.org/proteinAction.do?id=2498&showAllSites=true>  
tankyrase 1-binding protein 1 [Homo sapiens] <http://www.phosphosite.org/proteinAction.do?id=4542&showAllSites=true>  
target of myb1 isoform 1 [Homo sapiens] <http://www.phosphosite.org/proteinAction.do?id=7770&showAllSites=true>  
tumor protein p53 binding protein 1 isoform 2 [Homo sapiens]  
tumor protein p53 binding protein, 2 isoform 2 [Homo sapiens]  
tumor protein D52-like 2 isoform a [Homo sapiens]  
nuclear pore complex-associated protein TPR [Homo sapiens]  
TTK protein kinase [Homo sapiens] <http://www.phosphosite.org/proteinAction.do?id=779&showAllSites=true>  
ubiquitin-associated protein 2-like isoform b [  
ubiquitin protein ligase E3 component n-recogin 1 [Homo sapiens]  
UBX domain containing 7 [Homo sapiens]  
ubiquitin specific protease 42 [Homo sapiens]  
ubiquitin specific protease 47 [Homo sapiens]  
ubiquitin specific peptidase 8 [Homo sapiens]  
WD repeat and HMG-box DNA binding protein 1 isoform 2 [Homo sapiens]  
widely-interspaced zinc finger motifs [Homo sapiens]  
nuclease sensitive element binding protein 1 [Homo sapiens]  
YEATS domain containing 2 [Homo sapiens]  
zinc finger CCCH-type containing 18 [Homo sapiens]  
zinc finger CCCH-type containing 18 [Homo sapiens]  
zinc finger antiviral protein isoform 2 [Homo sapiens]  
zinc finger antiviral protein isoform 2 [Homo sapiens] <http://www.phosphosite.org/proteinAction.do?id=6205&showAllSites=true>  
zinc finger CCHC domain-containing protein 8 [Homo sapiens]  
proline/serine-rich coiled-coil 2 [Homo sapiens] <http://www.phosphosite.org/proteinAction.do?id=13471&showAllSites=true>

zinc finger, FYVE domain containing 16 [Homo sapiens]  
zinc finger protein 198 [Homo sapiens]  
zinc finger protein 446 [Homo sapiens]  
zinc finger protein 462 [Homo sapiens]  
zinc finger protein 687 [Homo sapiens]  
zinc finger protein 768 [Homo sapiens]  
zyxin [Homo sapiens]

<http://www.phosphosite.org/proteinAction.do?id=5439&showAllSites=true>  
<http://www.phosphosite.org/proteinAction.do?id=5992&showAllSites=true>

<http://www.phosphosite.org/proteinAction.do?id=6400&showAllSites=true>
